# Supplementary material for: Solid-state transformation of TMA-magadiite into zeolite omega and detailed insights into the crystallization process
Source: Royal Society of Chemistry journal article supplement (doi:10.1039/c9dt02945a), 2019-01-01
Supplement: c9dt02945a1.pdf [file c9dt02945a1.pdf]

Supporting Information

**Solid state transformation of TMA-magadiite into zeolite omega  
and the highly insights of the crystallization process**

Tianming Lv <sup>a</sup>, Yu Wang <sup>a,\*</sup>, Shoulei Zhang <sup>a</sup>, Zhe Feng <sup>a</sup>, Jiqi Zheng <sup>a</sup>, Jing Yang <sup>b</sup>, Xin  
Liu <sup>a</sup>, Xiaoyu Liu <sup>a</sup>, Changgong Meng <sup>a</sup>

a: School of Chemical Engineering, Dalian University of Technology, No.2  
Linggong Road, Ganjingzi District, Dalian 116024, China.

b: School of Chemistry and Chemical Engineering, Liaoning Normal University,  
No.850 Huanghe Road Shahekou District, Dalian 116029, China

\*: corresponding author, E-mail: [wangyu\\_200\\_2@dlut.edu.cn](mailto:wangyu_200_2@dlut.edu.cn)

**Fig. S1**

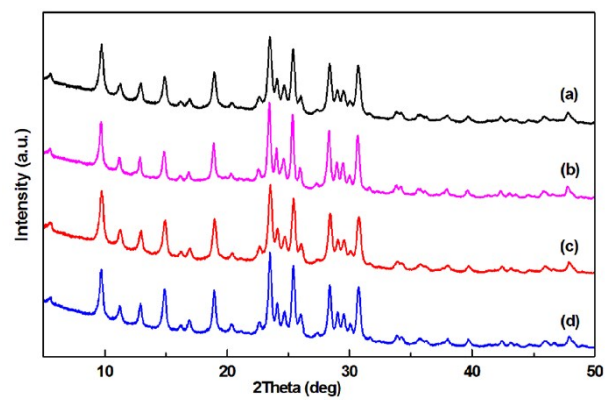

Fig. S1 XRD patterns of samples obtained by recycling waste mother liquid: (a) sample-1, (b) sample-2, (c) sample-3 and (d) sample-4. (No. 1-4, Table 2).

**Fig. S2**

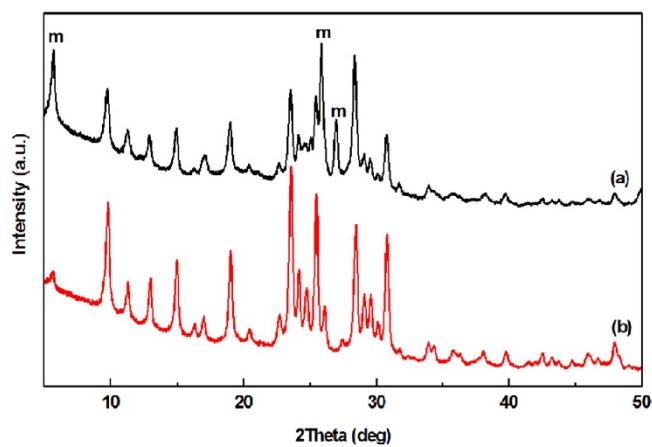

Fig. S2 XRD patterns of products obtained with different precursors which are synthesized with different stirring time: (a) 12 h and (b) 48 h (No. 7-8, Table 1). Peaks: m=magadiite, no mark=zeolite omega.

**Fig. S3**

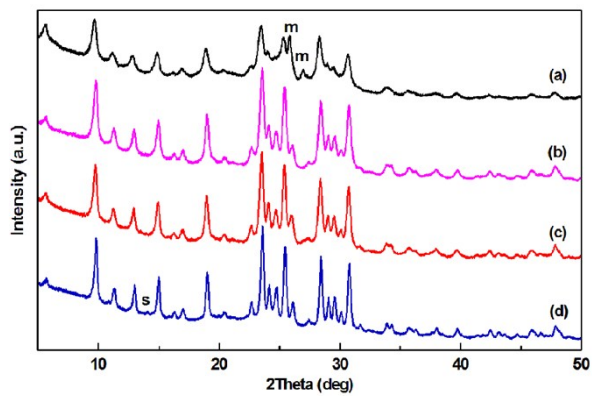

Fig. S3 XRD patterns of products obtained at various temperature: (a)70 °C, (b) 80 °C ,  
(c) 90 °C and (d) 110 °C for 12 h.(No. 9-12, Table 1).Peaks: m=magadiite, s=SOD, no  
mark=zeolite omega.

**Fig. S4**

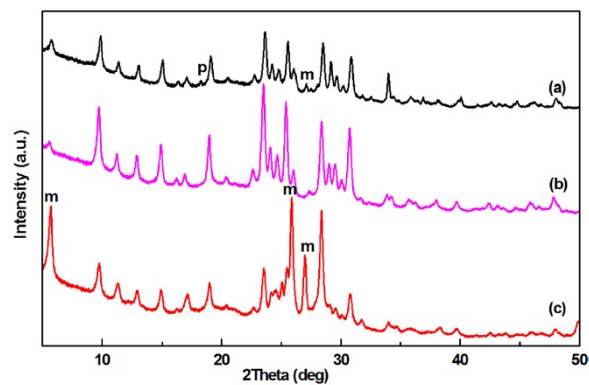

Fig. S4 XRD patterns of products obtained from different precursors which are synthesized with various SiO<sub>2</sub>/Al<sub>2</sub>O<sub>3</sub> ratios: (a) 2, (b) 5 and (c) 10 for 12 h. (No. 13-15, Table 1). Peaks: m=magadiite, p=Na-P, no mark=zeolite omega.

**Fig. S5**

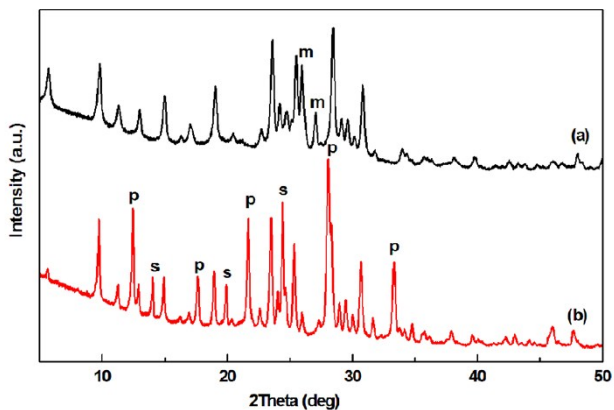

Fig. S5 XRD patterns of products obtained from different precursors which are synthesized with various Na<sub>2</sub>O/SiO<sub>2</sub> ratios: (a) 3.6 and (b) 6 for 12 h. (No. 16-17, Table 1). Peaks: m=magadiite, s=SOD, p=Na-P, no mark=zeolite omega.

**Fig. S6**

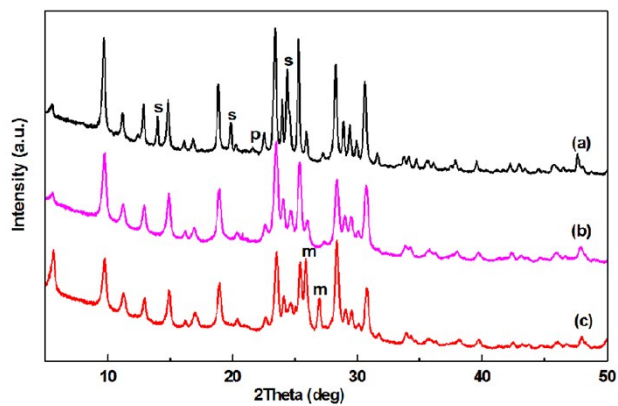

Fig. S6 XRD patterns of products obtained from different precursors which are synthesized with various  $\text{H}_2\text{O}/\text{Al}_2\text{O}_3$  ratios: (a) 140, (b) 160 and (c) 200 for 12 h (No. 18-20, Table 1). Peaks: m=magadiite, s=SOD, p=Na-P, no mark=zeolite omega.

**Fig. S7**

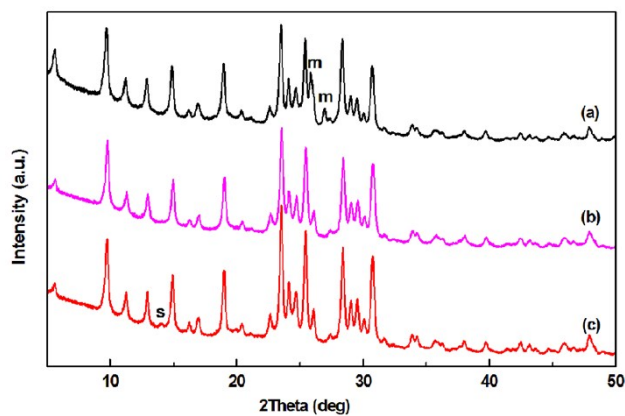

Fig. S7 XRD patterns of products obtained from different precursors which are synthesized with various TAMBr/Al<sub>2</sub>O<sub>3</sub> ratios: (a) 0.72, (b) 1.44 and (c) 1.68 for 12 h (No. 21-23, Table 1). Peaks: m=magadiite, s=SOD, no mark=zeolite omega.
